# Supplementary material for: Apically linked iron(ii) α-dioximate and α-oximehydrazonate bis-clathrochelates: synthesis, structure and electrocatalytic properties
Source: Royal Society of Chemistry journal article supplement (doi:10.1039/c3dt50881a), 2013-01-01
Supplement: c3dt50881a.pdf [file c3dt50881a.pdf]

## Electronic Supplementary Information

for

### **Apically linked iron(II) $\alpha$ -dioximate and $\alpha$ -oximehydrazonate bis-clathrochelates with hydrocarbon spacer substituents and their semi- and monoclathrochelate precursors and analogs: synthetic strategy, structure, redox and electrocatalytic properties**

Irina G. Belaya,<sup>a</sup> Semen V. Svidlov,<sup>b</sup> Alexander V. Dolganov,<sup>a</sup> Genrikh E. Zelinskii,<sup>a</sup> Tamara V. Potapova,<sup>b</sup> Anna V. Vologzhanina,<sup>a</sup> Oleg A. Varzatskii,<sup>c</sup> Yurii N. Bubnov,<sup>a,b</sup> Yan Z. Voloshin<sup>a,\*</sup>

<sup>a</sup> *Nesmeyanov Institute of Organoelement Compounds of the Russian Academy of Sciences, 119991 Moscow, Russia, fax: +7-499-135-50-85,*

<sup>b</sup> *Zelinskii Institute of Organic Chemistry of the Russian Academy of Sciences, 119991 Moscow, Russia*

<sup>c</sup> *Vernadskii Institute of General and Inorganic Chemistry of the National Academy of Sciences of Ukraine, 03680 Kiev, Ukraine*

**Table S1** The maxima ( $\lambda_{\text{max}}$ , nm ( $\varepsilon \cdot 10^{-3}$ , mol<sup>-1</sup> l cm<sup>-1</sup>)) of the UV–vis spectra for the dioximate and oximehydrazone bis-semi- and -clathrochelates obtained and their monomacrobicyclic analog.

| Complex                                                                                                                                                     | $\lambda_1$ ( $\varepsilon_1$ ) | $\lambda_2$ ( $\varepsilon_2$ ) | $\lambda_3$ ( $\varepsilon_3$ ) | $\lambda_4$ ( $\varepsilon_4$ ) | $\lambda_5$ ( $\varepsilon_5$ ) | $\lambda_6$ ( $\varepsilon_6$ ) | $\lambda_7$ ( $\varepsilon_7$ ) | $\lambda_8$ ( $\varepsilon_8$ ) | $\lambda_9$ ( $\varepsilon_9$ ) |
|-------------------------------------------------------------------------------------------------------------------------------------------------------------|---------------------------------|---------------------------------|---------------------------------|---------------------------------|---------------------------------|---------------------------------|---------------------------------|---------------------------------|---------------------------------|
| FeNx <sub>3</sub> (Bn-C <sub>4</sub> H <sub>9</sub> )(BC <sub>6</sub> H <sub>5</sub> )                                                                      |                                 | 247(11)                         |                                 | 281(6.9)                        | 297(3.0)                        | 377(2.4)                        | 432(5.4)                        | 455(13)                         |                                 |
| {FeNx <sub>3</sub> (Bn-C <sub>4</sub> H <sub>9</sub> ) <sub>2</sub> (BC <sub>6</sub> H <sub>4</sub> B)                                                      |                                 | 249(21)                         |                                 | 283(21)                         | 302(6.7)                        | 357(2.9)                        | 422(2.0)                        | 443(18)                         | 451(19)                         |
| {FeNx <sub>3</sub> (Bn-C <sub>4</sub> H <sub>9</sub> ) <sub>2</sub> (B(CH <sub>2</sub> ) <sub>3</sub> B)                                                    |                                 | 246(17)                         |                                 | 282(12)                         | 294(5.2)                        | 378(5.3)                        | 421(9.2)                        | 451(29)                         | 488(5.2)                        |
| [{Fe(DXO) <sub>3</sub> } <sub>2</sub> (B(CH <sub>2</sub> ) <sub>3</sub> B)](BF <sub>4</sub> ) <sub>2</sub>                                                  | 219(29)                         | 249(12)                         |                                 | 277(22)                         | 300(13)                         | 326(4.0)                        | 414(3.8)                        | 444(7.5)                        | 478(13) 482(6.0)                |
| [{Fe(DXO) <sub>3</sub> (HCOC <sub>2</sub> H <sub>5</sub> ) <sub>3</sub> } <sub>2</sub> (B(CH <sub>2</sub> ) <sub>3</sub> B)](BF <sub>4</sub> ) <sub>2</sub> |                                 |                                 | 260(6.3)                        | 273(4.4)                        | 297(11)                         |                                 | 420(3.3)                        | 460(6.6)                        | 497(14) 517(3.8)                |
| [{Fe(DXO) <sub>3</sub> (CH <sub>2</sub> ) <sub>3</sub> } <sub>2</sub> (B(CH <sub>2</sub> ) <sub>3</sub> B)](BF <sub>4</sub> ) <sub>2</sub>                  | 222(43)                         | 242(4.5)                        | 260(17)                         | 285(8.2)                        | 311(5.8)                        | 347(4.7)                        | 416(3.8)                        | 460(7.0)                        | 496(13) 513(7.0)                |
